# Supplementary material for: Di- and tri-valent chlorochromium complexes bearing hydrotris(3,5-diisopropylpyrazolyl)borato ligand (TpiPr2), TpiPr2CrCln(L) (n = 1, 2) and [TpiPr2Cr(μ-Cl)]2: flexible coordination behavior of the TpiPr2 ligand and reduction features of Cr(ii) species
Source: Royal Society of Chemistry journal article supplement (doi:10.1039/b207326a), 2002-01-01
Supplement: b207326a.pdf [file b207326a.pdf]

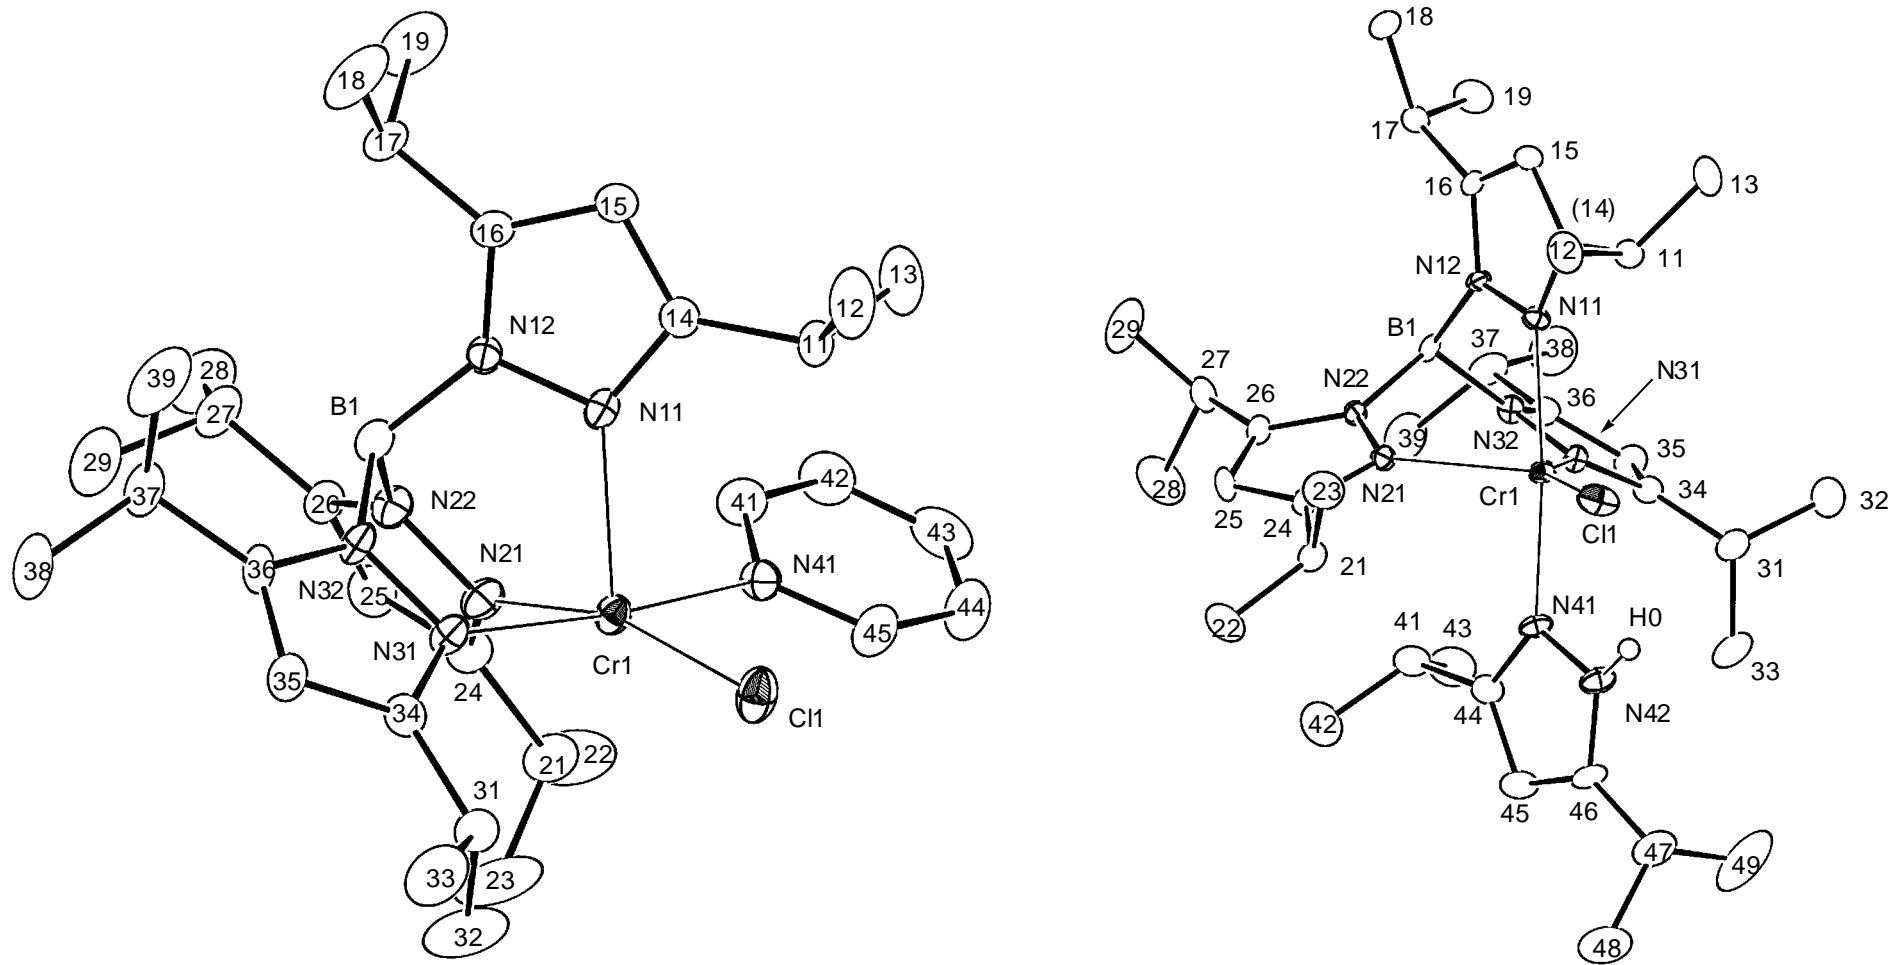

Figure S1. Atomic numbering schemes for **1b** (left) and **1a** (right). Labels without atom names are for carbon atoms.

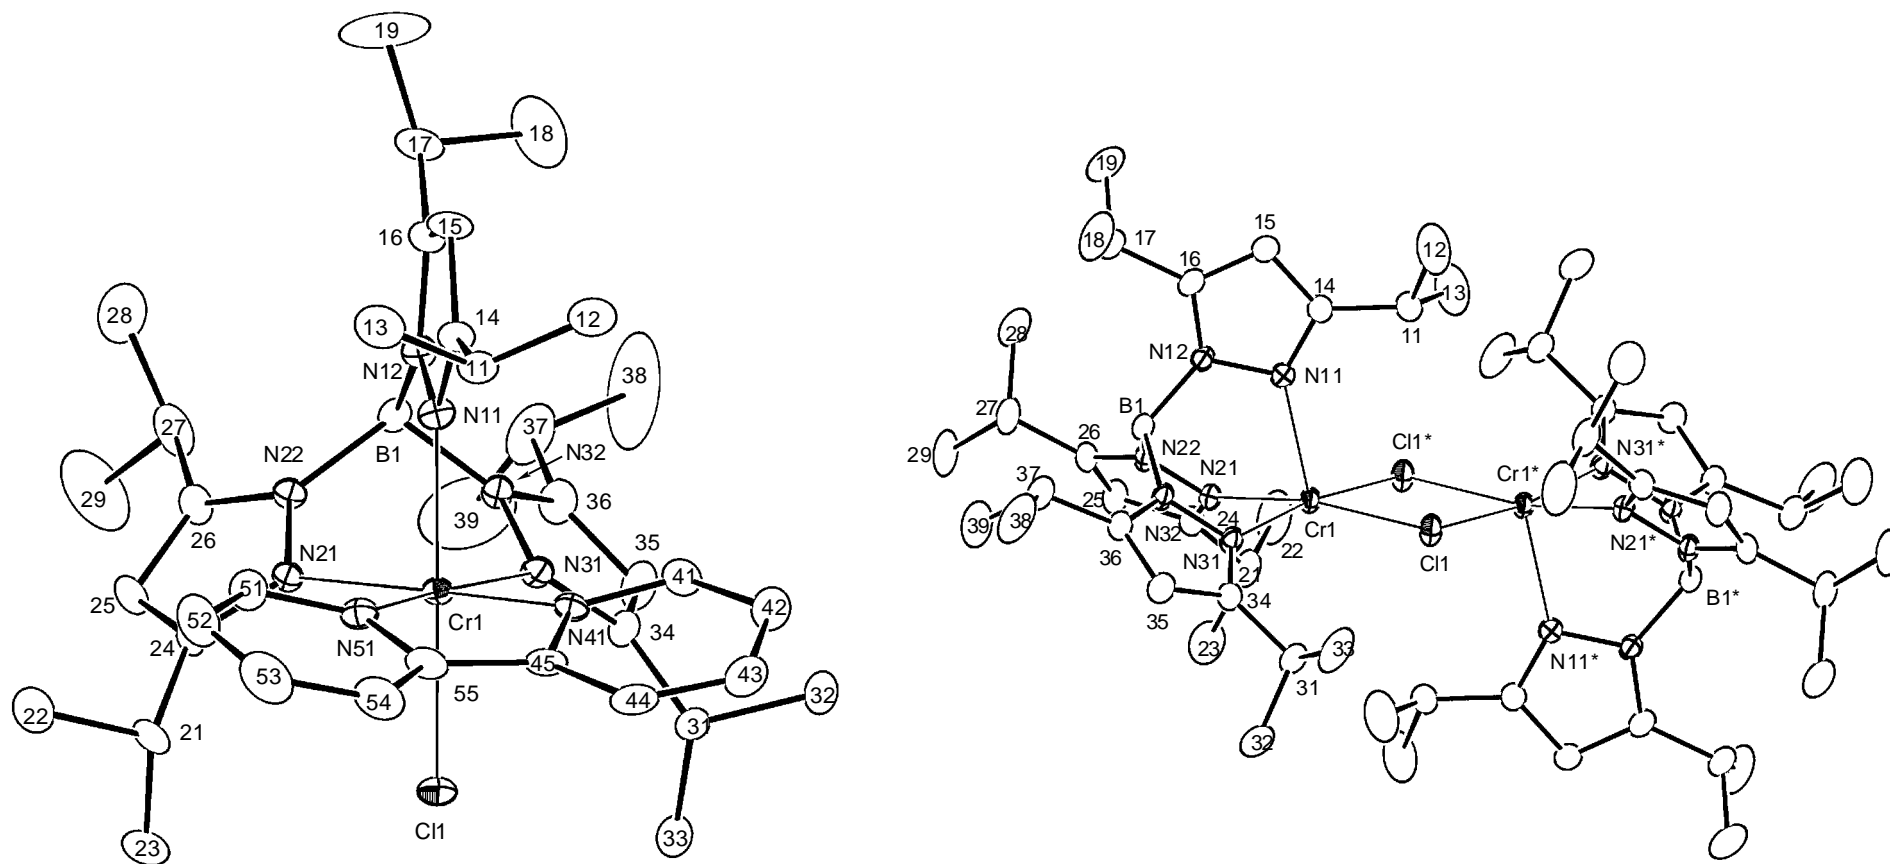

Figure S2. Atomic numbering schemes for **2** (left) and **3** (right). Labels without atom names are for carbon atoms.

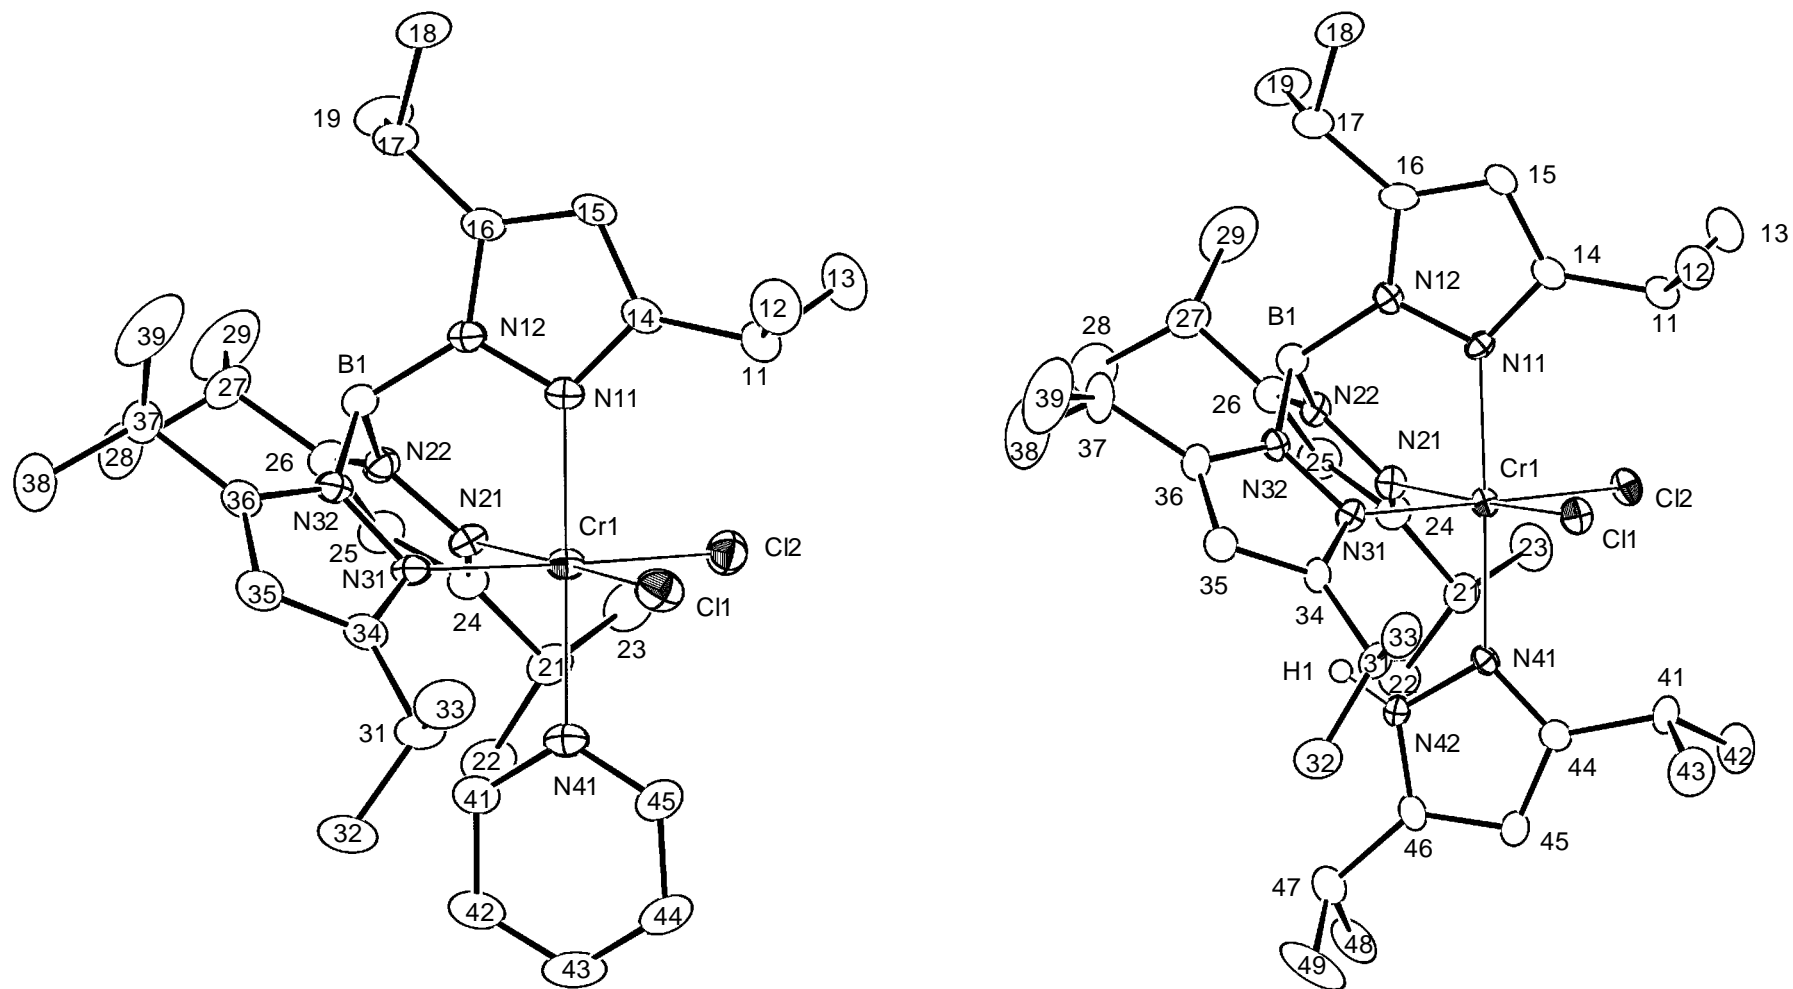

Figure S3. Atomic numbering schemes for **6b**. (left) and **6a** (right). Labels without atom names are for carbon atoms.

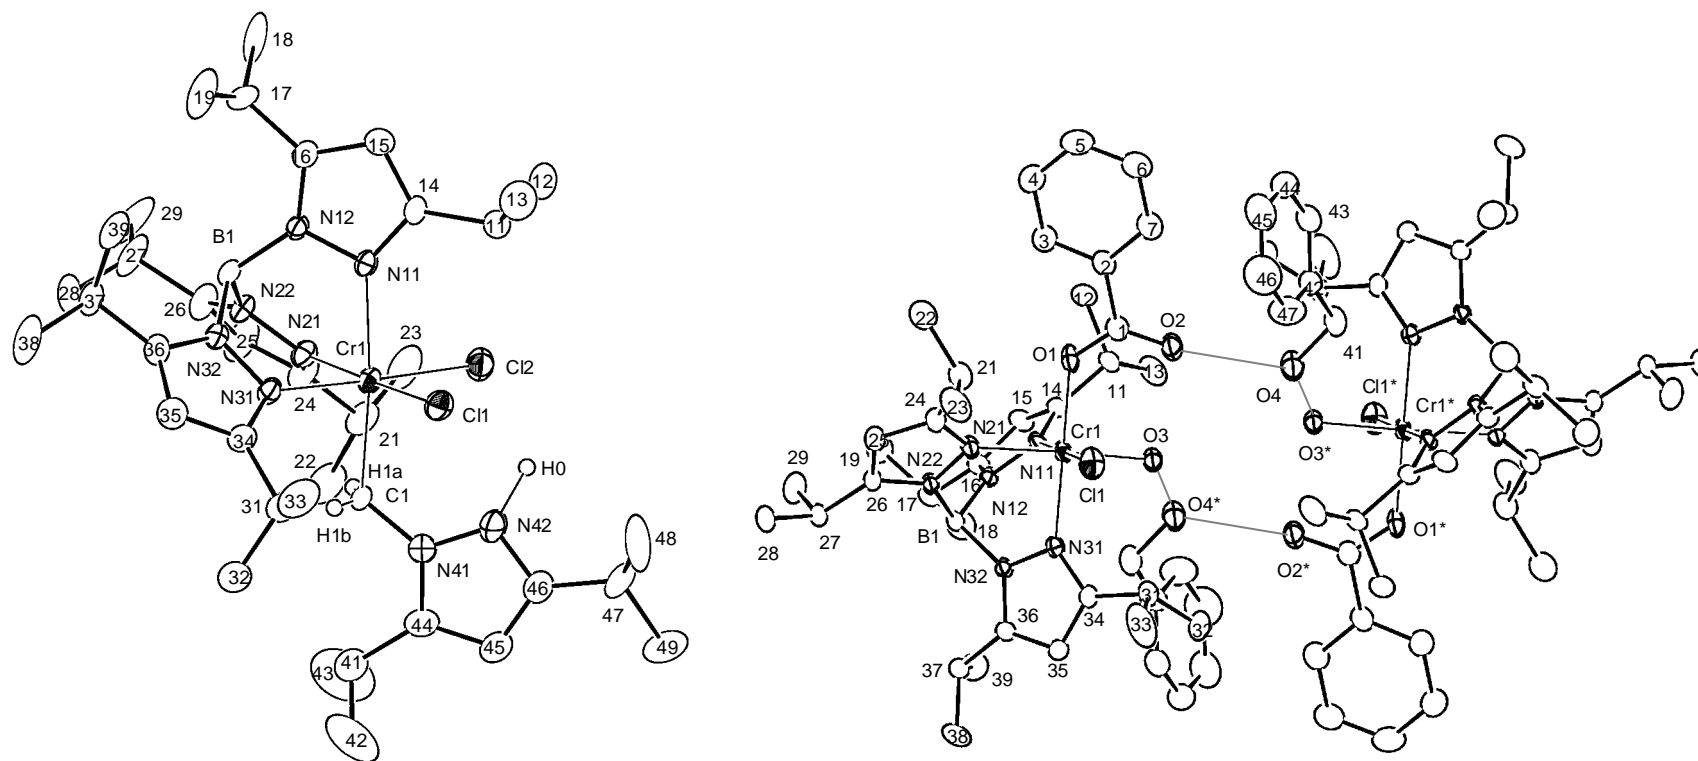

Figure S4. Atomic numbering schemes for the **7a** (left) and **9** (right). Labels without atom names are for carbon atoms.

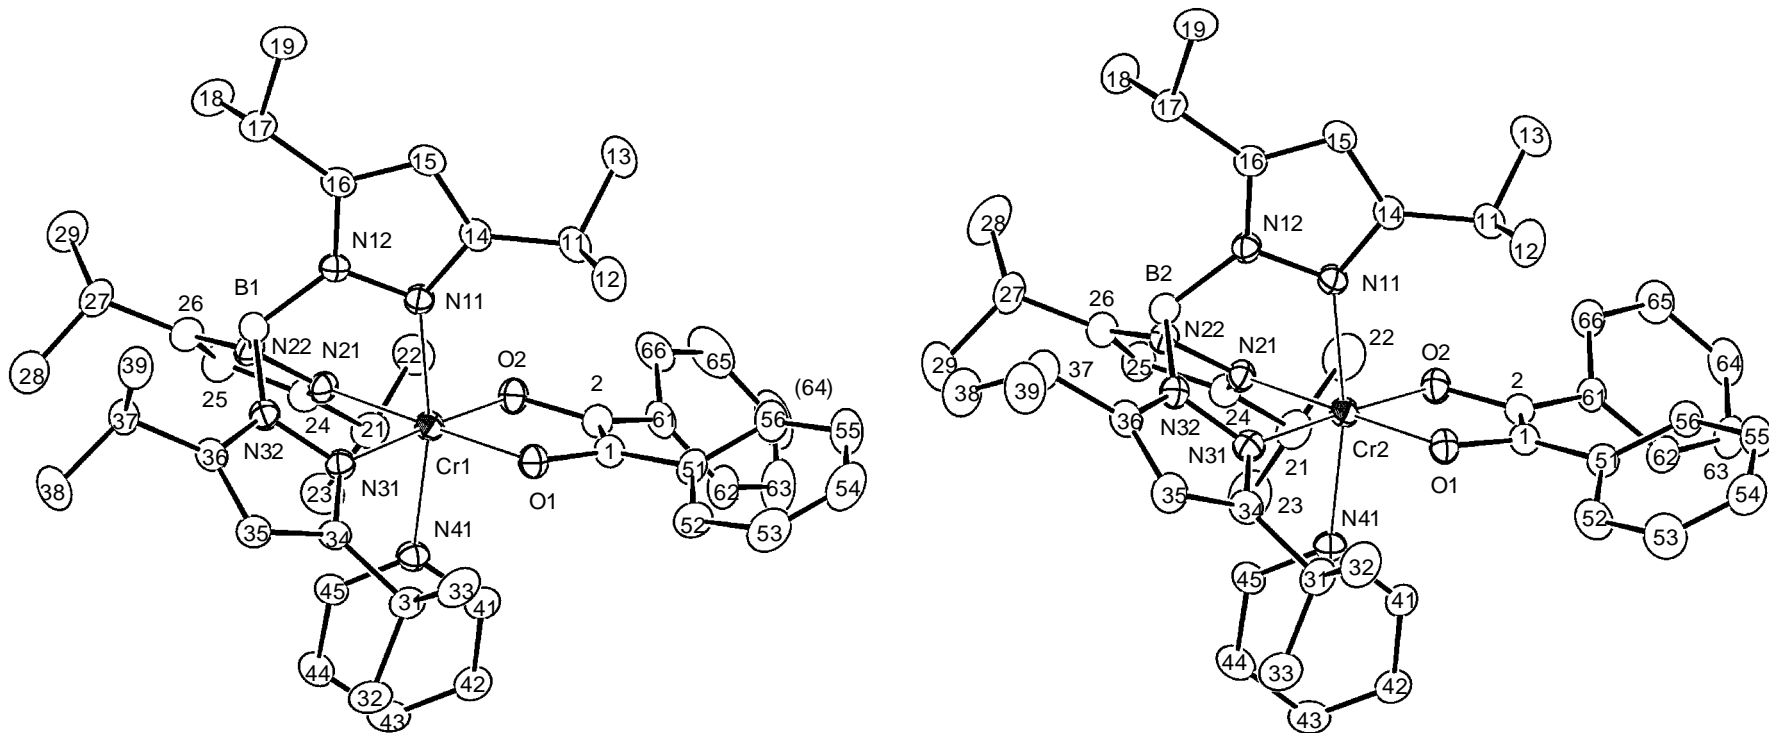

Figure S5. Atomic numbering schemes for the **8** (left: A-series; right B-series). Labels without atom names are for carbon atoms.
